# Supplementary material
Source: HighWire-hosted journal article supplement (https://www.jrheum.org/highwire/filestream/40638/field_highwire_adjunct_files/0/210077DataSuppl.pdf)
Supplement: 210077DataSuppl.pdf [file 210077DataSuppl.pdf]

**ONLINE SUPPLEMENTARY MATERIAL**

**Supplementary Table 1.** TAWiC from knee and ankle ROI in children with JIA group and healthy children using only joint exam as gold standard

| <b>Variables, Mean ± SD</b>                           | <b>Inflamed joints (JIA)</b> | <b>Uninflamed joints (JIA &amp; control)</b> | <b>p value</b> |
|-------------------------------------------------------|------------------------------|----------------------------------------------|----------------|
| <b>Analyses of Knees and Corresponding Mid Tibia</b>  |                              |                                              |                |
|                                                       | <b>N=49</b>                  | <b>N=149</b>                                 |                |
| <b>Knee</b>                                           |                              |                                              |                |
| 95 <sup>th</sup> absolute (Anterior)                  | 34.53 ± 1.16                 | 33.76 ± 1.24                                 | <.001          |
| 95 <sup>th</sup> absolute (Lateral)                   | 34.12 ± .99                  | 33.54 ± 1.04                                 | <.001          |
| 95 <sup>th</sup> absolute (Medial)                    | 34.12 ± .98                  | 33.58 ± 1.19                                 | <.001          |
| 95 <sup>th</sup> absolute (Posterior)                 | 34.36 ± 1.04                 | 34.27 ± .99                                  | .63            |
| 95 <sup>th</sup> TAWiC (Anterior)                     | 1.01 ± .86                   | -.06 ± .51                                   | <.001          |
| 95 <sup>th</sup> TAWiC (Lateral)                      | 1.17 ± .90                   | .19 ± .50                                    | <.001          |
| 95 <sup>th</sup> TAWiC (Medial)                       | 1.28 ± .79                   | .30 ± .60                                    | <.001          |
| 95 <sup>th</sup> TAWiC (Posterior)                    | 1.91 ± .80                   | 1.67 ± .57                                   | .08            |
| Mean absolute (Anterior)                              | 33.37 ± 1.23                 | 32.70 ± 1.31                                 | .002           |
| Mean absolute (Lateral)                               | 32.83 ± .98                  | 32.56 ± 1.11                                 | .12            |
| Mean absolute (Medial)                                | 32.99 ± 1.00                 | 32.63 ± 1.17                                 | .05            |
| Mean absolute (Posterior)                             | 33.08 ± 1.08                 | 33.0 ± 1.1                                   | .68            |
| Mean TAWiC (Anterior)                                 | .60 ± .98                    | -.37 ± .57                                   | <.001          |
| Mean TAWiC (Lateral)                                  | .69 ± .72                    | -.11 ± .54                                   | <.001          |
| Mean TAWiC (Medial)                                   | .87 ± .74                    | .03 ± .61                                    | <.001          |
| Mean TAWiC (Posterior)                                | 1.51 ± .69                   | 1.23 ± .54                                   | .02            |
| <b>Mid tibia</b>                                      |                              |                                              |                |
| 95 <sup>th</sup> absolute (Anterior)                  | 33.52 ± 1.21                 | 33.83 ± 1.19                                 | .15            |
| Mean absolute (Anterior)                              | 32.77 ± 1.24                 | 33.08 ± 1.25                                 | .16            |
| <b>Analyses of Ankles and Corresponding Mid Tibia</b> |                              |                                              |                |
|                                                       | <b>N=25</b>                  | <b>N=173</b>                                 |                |
| <b>Ankle</b>                                          |                              |                                              |                |
| 95 <sup>th</sup> absolute (Anterior)                  | 33.84 ± 1.55                 | 33.54 ± 1.76                                 | .40            |
| 95 <sup>th</sup> TAWiC (Anterior)                     | .62 ± 1.17                   | -.28 ± 1.11                                  | .001           |
| Mean absolute (Anterior)                              | 32.07 ± 1.65                 | 32.23 ± 1.72                                 | .68            |
| Mean TAWiC (Anterior)                                 | -.43 ± .94                   | -.84 ± .95                                   | .04            |
| <b>Mid tibia</b>                                      |                              |                                              |                |
| 95 <sup>th</sup> absolute (Anterior)                  | 33.22 ± 1.43                 | 33.83 ± 1.15                                 | .05            |
| Mean absolute (Anterior)                              | 32.50 ± 1.37                 | 33.07 ± 1.22                                 | .05            |

TAWiC: Temperature After Within-limb Calibration, ROI: region of interest,

**Supplementary Table 2.** Area under the curve and threshold when using TAWiC from knee and ankle only using joint exam as gold standard

| Variables                          | AUC   | Youden-maximizing threshold (C) | Youden index | sensitivity    | specificity    |
|------------------------------------|-------|---------------------------------|--------------|----------------|----------------|
| <b>Knee</b>                        |       |                                 |              |                |                |
| 95 <sup>th</sup> TAWiC (Anterior)  | 0.847 | 0.540                           | 0.621        | 0.735          | 0.886          |
| 95 <sup>th</sup> TAWiC (Lateral)   | 0.830 | 0.795                           | 0.537        | 0.612          | 0.925          |
| 95 <sup>th</sup> TAWiC (Medial)    | 0.836 | 0.950                           | 0.605        | 0.714          | 0.891          |
| 95 <sup>th</sup> TAWiC (Posterior) | 0.595 | 1.940                           | 0.214        | 0.489          | 0.725          |
| Mean TAWiC (Anterior)              | 0.808 | 0.305                           | 0.481        | 0.592          | 0.899          |
| Mean TAWiC (Lateral)               | 0.824 | 0.210                           | 0.524        | 0.796          | 0.728          |
| Mean TAWiC (Medial)                | 0.811 | 0.265 or 0.310                  | 0.483        | 0.796 or 0.776 | 0.673 or 0.707 |
| Mean TAWiC (Posterior)             | 0.608 | 1.450                           | 0.243        | 0.511          | 0.732          |
| <b>Ankle</b>                       |       |                                 |              |                |                |
| 95 <sup>th</sup> TAWiC (Anterior)  | 0.703 | 0.130                           | 0.321        | 0.720          | 0.601          |
| Mean TAWiC (Anterior)              | 0.624 | -0.345                          | 0.253        | 0.600          | 0.653          |

TAWiC: Temperature After Within-limb Calibration, AUC: area under the curve, Youden index=sensitivity + specificity -1

**Supplementary Table 3.** Correlation of gender, age, height, weight, BMI and body temperature with TAWiC\_knee and TAWiC\_ankle by using joint exam as gold standard

| Variable              | Healthy control | Uninflamed joint (JIA) | Inflamed joint (JIA) |
|-----------------------|-----------------|------------------------|----------------------|
| <b>Anterior Knee</b>  | <b>N=96</b>     | <b>N=53</b>            | <b>N=49</b>          |
| Gender                | .71 (.493)      | .163 (.243)            | .164 (.260)          |
| Age                   | .0698 (.509)    | -.119 (.397)           | -.121 (.407)         |
| Height                | .090 (.383)     | -.175 (.211)           | -.077 (.597)         |
| Weight                | .128 (.215)     | -.178 (.202)           | .060 (.684)          |
| BMI                   | .068 (.510)     | -.168 (.229)           | .095 (.518)          |
| <b>Lateral Knee</b>   | <b>N=94</b>     | <b>N=53</b>            | <b>N=49</b>          |
| Gender                | -.108 (.298)    | .191 (.170)            | .289 (.044)          |
| Age                   | .032 (.757)     | -.243 (.079)           | -.252 (.081)         |
| Height                | .123 (.238)     | -.236 (.089)           | -.224 (.121)         |
| Weight                | .158 (.129)     | -.192 (.168)           | -.144 (.322)         |
| BMI                   | .109 (.297)     | -.070 (.618)           | -.113 (.439)         |
| <b>Medial Knee</b>    | <b>N=96</b>     | <b>N=53</b>            | <b>N=49</b>          |
| Gender                | .094 (.368)     | -.039 (.780)           | -.001 (.997)         |
| Age                   | .142 (.171)     | .057 (.683)            | .130 (.372)          |
| Height                | .130 (.213)     | .016 (.912)            | .201 (.167)          |
| Weight                | .059 (.571)     | .068 (.627)            | .318 (.026)          |
| BMI                   | -.062 (.553)    | .023 (.870)            | .254 (.078)          |
| <b>Posterior Knee</b> | <b>N=96</b>     | <b>N=53</b>            | <b>N=47</b>          |
| Gender                | .236 (.020)     | -.041 (.773)           | -.240 (.104)         |
| Age                   | .077 (.454)     | -.011 (.940)           | .113 (.451)          |
| Height                | .067 (.517)     | -.049 (.730)           | .195 (.190)          |
| Weight                | .035 (.737)     | .080 (.567)            | .239 (.105)          |
| BMI                   | -.040 (.696)    | .097 (.491)            | .080 (.594)          |
| <b>Anterior Ankle</b> | <b>N=96</b>     | <b>N=77</b>            | <b>N=25</b>          |
| Gender                | -.206 (.045)    | .099 (.393)            | .035 (.867)          |
| Age                   | -.220 (.031)    | -.285 (.012)           | -.453 (.023)         |
| Height                | -.089 (.386)    | -.266 (.019)           | -.406 (.044)         |
| Weight                | .145 (.159)     | -.141 (.221)           | -.133 (.526)         |
| BMI                   | .307 (.002)     | .093 (.423)            | .106 (.613)          |

Values were expressed as correlation coefficient (p value). TAWiC: Temperature After Within-limb Calibration, US: ultrasound, JIA: juvenile idiopathic arthritis

**Supplementary Table 4.** Total pixels within each region of interest

| Variable              | Healthy control | Uninflamed joint (JIA) | Inflamed joint (JIA) |
|-----------------------|-----------------|------------------------|----------------------|
| <b>Anterior Knee</b>  | <b>N=96</b>     | <b>N=46</b>            | <b>N=45</b>          |
| Knee                  | 2130 (558)      | 2096 (550)             | 3242 (741)           |
| mid-tibia             | 896 (249)       | 869 (217)              | 966 (319)            |
| <b>Lateral Knee</b>   | <b>N=94</b>     | <b>N=46</b>            | <b>N=45</b>          |
| Knee                  | 2348 (767)      | 2227 (608)             | 2599 (909)           |
| mid-tibia             | 942 (281)       | 938 (256)              | 1065 (365)           |
| <b>Medial Knee</b>    | <b>N=94</b>     | <b>N=46</b>            | <b>N=45</b>          |
| Knee                  | 2407 (792)      | 2352 (643)             | 2705 (857)           |
| mid-tibia             | 1000 (240)      | 1016 (243)             | 1106 (338)           |
| <b>Posterior Knee</b> | <b>N=96</b>     | <b>N=43</b>            | <b>N=43</b>          |
| Knee                  | 2448 (674)      | 2399 (625)             | 2726 (847)           |
| mid-tibia             | 1049 (289)      | 1018 (257)             | 1172 (411)           |
| <b>Anterior Ankle</b> | <b>N=96</b>     | <b>N=72</b>            | <b>N=20</b>          |
| Ankle                 | 859 (217)       | 884 (255)              | 892 (226)            |
| mid-tibia             | 896 (249)       | 929 (297)              | 871 (193)            |

Values were expressed as means and standard deviation. JIA: juvenile idiopathic

**Supplementary Table 5.** TAWiC from knee and ankle ROI in children with JIA group and healthy children using only ultrasound as gold standard

| <b>Variables, Mean ± SD</b>                           | <b>Inflamed joints (JIA)</b> | <b>Uninflamed joints (JIA &amp; control)</b> | <b>p value</b> |
|-------------------------------------------------------|------------------------------|----------------------------------------------|----------------|
| <b>Analyses of Knees and Corresponding Mid Tibia</b>  |                              |                                              |                |
|                                                       | <b>N=55</b>                  | <b>N=143</b>                                 |                |
| <b>Knee</b>                                           |                              |                                              |                |
| 95 <sup>th</sup> absolute (Anterior)                  | 34.40 ± 1.19                 | 33.78 ± 1.25                                 | .003           |
| 95 <sup>th</sup> absolute (Lateral)                   | 33.99 ± 1.00                 | 33.56 ± 1.05                                 | .01            |
| 95 <sup>th</sup> absolute (Medial)                    | 34.02 ± 1.04                 | 33.60 ± 1.19                                 | .03            |
| 95 <sup>th</sup> absolute (Posterior)                 | 34.32 ± 1.02                 | 34.28 ± 1.00                                 | .86            |
| 95 <sup>th</sup> TAWiC (Anterior)                     | .81 ± .89                    | -.03 ± .56                                   | <.001          |
| 95 <sup>th</sup> TAWiC (Lateral)                      | .96 ± .86                    | .23 ± .60                                    | <.001          |
| 95 <sup>th</sup> TAWiC (Medial)                       | 1.15 ± .84                   | .31 ± .61                                    | <.001          |
| 95 <sup>th</sup> TAWiC (Posterior)                    | 1.92 ± .80                   | 1.64 ± .55                                   | .05            |
| Mean absolute (Anterior)                              | 33.22 ± 1.30                 | 32.73 ± 1.30                                 | .03            |
| Mean absolute (Lateral)                               | 32.76 ± 1.03                 | 32.57 ± 1.10                                 | .30            |
| Mean absolute (Medial)                                | 32.92 ± 1.08                 | 32.64 ± 1.15                                 | .18            |
| Mean absolute (Posterior)                             | 33.05 ± 1.04                 | 33.01 ± 1.09                                 | .81            |
| Mean TAWiC (Anterior)                                 | .43 ± 1.05                   | -.35 ± 0.57                                  | <.001          |
| Mean TAWiC (Lateral)                                  | .57 ± .75                    | -.09 ± .55                                   | <.001          |
| Mean TAWiC (Medial)                                   | .80 ± .77                    | .03 ± .60                                    | <.001          |
| Mean TAWiC (Posterior)                                | 1.55 ± .69                   | 1.21 ± .52                                   | .005           |
| <b>Mid tibia</b>                                      |                              |                                              |                |
| 95 <sup>th</sup> absolute (Anterior)                  | 33.58 ± 1.26                 | 33.82 ± 1.18                                 | .30            |
| Mean absolute (Anterior)                              | 32.80 ± 1.29                 | 33.08 ± 1.23                                 | .24            |
| <b>Analyses of Ankles and Corresponding Mid Tibia</b> |                              |                                              |                |
|                                                       | <b>N=19</b>                  | <b>N=179</b>                                 |                |
| <b>Ankle</b>                                          |                              |                                              |                |
| 95 <sup>th</sup> absolute (Anterior)                  | 33.96 ± 1.50                 | 33.54 ± 1.76                                 | .23            |
| 95 <sup>th</sup> TAWiC (Anterior)                     | .71 ± 1.11                   | -.26 ± 1.13                                  | <.001          |
| Mean absolute (Anterior)                              | 32.21 ± 1.55                 | 32.21 ± 1.73                                 | .98            |
| Mean TAWiC (Anterior)                                 | -.39 ± .74                   | -.84 ± .97                                   | .01            |
| <b>Mid tibia</b>                                      |                              |                                              |                |
| 95 <sup>th</sup> absolute (Anterior)                  | 33.25 ± 1.46                 | 33.80 ± 1.16                                 | .09            |
| Mean absolute (Anterior)                              | 32.60 ± 1.42                 | 33.04 ± 1.23                                 | .16            |

TAWiC: Temperature After Within-limb Calibration, ROI: region of interest,

**Supplementary Table 6.** Area under the curve and threshold when using TAWiC from knee and ankle only using ultrasound as gold standard

| Variables                          | AUC   | Youden-maximizing threshold (C) | Youden index | sensitivity | specificity |
|------------------------------------|-------|---------------------------------|--------------|-------------|-------------|
| <b>Knee</b>                        |       |                                 |              |             |             |
| 95 <sup>th</sup> TAWiC (Anterior)  | 0.781 | 0.600                           | 0.488        | 0.600       | 0.888       |
| 95 <sup>th</sup> TAWiC (Lateral)   | 0.763 | 0.710                           | 0.426        | 0.582       | 0.844       |
| 95 <sup>th</sup> TAWiC (Medial)    | 0.778 | 1.065                           | 0.526        | 0.618       | 0.908       |
| 95 <sup>th</sup> TAWiC (Posterior) | 0.597 | 2.210                           | 0.202        | 0.315       | 0.887       |
| Mean TAWiC (Anterior)              | 0.743 | 0.305                           | 0.447        | 0.545       | 0.902       |
| Mean TAWiC (Lateral)               | 0.763 | 0.385                           | 0.444        | 0.600       | 0.844       |
| Mean TAWiC (Medial)                | 0.778 | 0.385                           | 0.442        | 0.655       | 0.773       |
| Mean TAWiC (Posterior)             | 0.643 | 1.485                           | 0.275        | 0.500       | 0.783       |
| <b>Ankle</b>                       |       |                                 |              |             |             |
| 95 <sup>th</sup> TAWiC (Anterior)  | 0.723 | 0.130                           | 0.445        | 0.842       | 0.603       |
| Mean TAWiC (Anterior)              | 0.654 | -0.310                          | 0.302        | 0.632       | 0.670       |

TAWiC: Temperature After Within-limb Calibration, AUC: area under the curve, Youden index=sensitivity + specificity -1
